# Supplementary material for: The attributes of the images representing the SARS-CoV-2 coronavirus affect people’s perception of the virus
Source: PLOS journal article supplement (doi:10.1371/journal.pone.0253738), 2021-08-25
Supplement: S6 (10.1371/journal.pone.0253738.s006) [file journal.pone.0253738.s006]

## Normality Test (Shapiro-Wilk)

Data source: Data

|                            |                     |           |        |
|----------------------------|---------------------|-----------|--------|
| Beauty_PhotoGraph:         | W-Statistic = 0,901 | P < 0,001 | Failed |
| Beauty_Illustration:       | W-Statistic = 0,963 | P < 0,001 | Failed |
| Beauty_Blackandwhite:      | W-Statistic = 0,758 | P < 0,001 | Failed |
| Beauty_Colour:             | W-Statistic = 0,968 | P < 0,001 | Failed |
| Beauty_2D:                 | W-Statistic = 0,921 | P < 0,001 | Failed |
| Beauty_3D:                 | W-Statistic = 0,964 | P < 0,001 | Failed |
| Scientific_PhotoGraph:     | W-Statistic = 0,976 | P < 0,001 | Failed |
| Scientific_Illustration:   | W-Statistic = 0,967 | P < 0,001 | Failed |
| Scientific_Blackandwhite:  | W-Statistic = 0,956 | P < 0,001 | Failed |
| Scientific_Colour:         | W-Statistic = 0,985 | P = 0,002 | Failed |
| Scientific_2D:             | W-Statistic = 0,986 | P = 0,002 | Failed |
| Scientific_3D:             | W-Statistic = 0,975 | P < 0,001 | Failed |
| Realism_PhotoGraph:        | W-Statistic = 0,981 | P < 0,001 | Failed |
| Realism_Illustration:      | W-Statistic = 0,944 | P < 0,001 | Failed |
| Realism_Blackandwhite:     | W-Statistic = 0,967 | P < 0,001 | Failed |
| Realism_Colour:            | W-Statistic = 0,977 | P < 0,001 | Failed |
| Realism_2D:                | W-Statistic = 0,986 | P = 0,003 | Failed |
| Realism_3D:                | W-Statistic = 0,959 | P < 0,001 | Failed |
| Infectivity_PhotoGraph:    | W-Statistic = 0,959 | P < 0,001 | Failed |
| Infectivity_Illustration:  | W-Statistic = 0,936 | P < 0,001 | Failed |
| Infectivity_Blackandwhite: | W-Statistic = 0,952 | P < 0,001 | Failed |
| Infectivity_Colour:        | W-Statistic = 0,953 | P < 0,001 | Failed |
| Infectivity_2D:            | W-Statistic = 0,958 | P < 0,001 | Failed |
| Infectivity_3D:            | W-Statistic = 0,945 | P < 0,001 | Failed |
| Fear_PhotoGraph:           | W-Statistic = 0,896 | P < 0,001 | Failed |
| Fear_Illustration:         | W-Statistic = 0,897 | P < 0,001 | Failed |
| Fear_Blackandwhite:        | W-Statistic = 0,882 | P < 0,001 | Failed |
| Fear_Colour:               | W-Statistic = 0,901 | P < 0,001 | Failed |
| Fear_2D:                   | W-Statistic = 0,887 | P < 0,001 | Failed |
| Fear_3D:                   | W-Statistic = 0,908 | P < 0,001 | Failed |
| Didactic_PhotoGraph:       | W-Statistic = 0,971 | P < 0,001 | Failed |
| Didactic_Illustration:     | W-Statistic = 0,970 | P < 0,001 | Failed |
| Didactic_Blackandwhite:    | W-Statistic = 0,967 | P < 0,001 | Failed |
| Didactic_Colour:           | W-Statistic = 0,978 | P < 0,001 | Failed |
| Didactic_2D:               | W-Statistic = 0,978 | P < 0,001 | Failed |
| Didactic_3D:               | W-Statistic = 0,970 | P < 0,001 | Failed |

A test that fails indicates that the data varies significantly from the pattern expected if the data was drawn from a population with a normal distribution.

A test that passes indicates that the data matches the pattern expected if the data was drawn from a population with a normal distribution.
